# Supplementary material
Source: PubMed Central journal article supplement (PMC5002085)
Supplement: mmc1.pdf [file mmc1.pdf]

**Biophysical Journal, Volume 111**

**Supplemental Information**

**Solvation Thermodynamics of Oligoglycine with Respect to Chain  
Length and Flexibility**

**Justin A. Drake, Robert C. Harris, and B. Montgomery Pettitt**

## Supporting Material

### Solvation thermodynamics of oligoglycine with respect to chain length and flexibility: implications for aggregation and collapse

JA Drake<sup>1</sup>, RC Harris<sup>2</sup>, and BM Pettitt<sup>1\*</sup>

<sup>1</sup> Department of Biochemistry and Molecular Biology, Sealy Center for Structural Biology and Molecular Biophysics, University of Texas Medical Branch, 301 University Blvd, Galveston, Texas, 77555-0304

<sup>2</sup> Department of Chemistry, Temple University, 1801 N Broad St, Philadelphia PA 19122

\* Corresponding Author: BM Pettitt  
Email: [bmpettitt@utmb.edu](mailto:bmpettitt@utmb.edu)

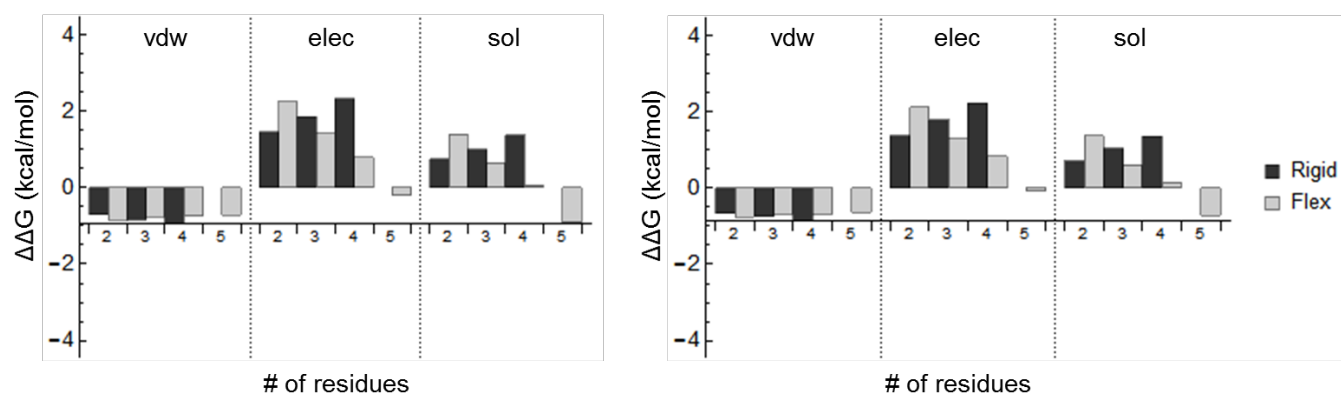

**Figure S1:** Differences in solvation free energy and its vdw and elec components between C36 and ff12SB at 300K (left) and 320K (right). Black and gray bars are the results for the rigid and flexible oligoglycine models, respectively

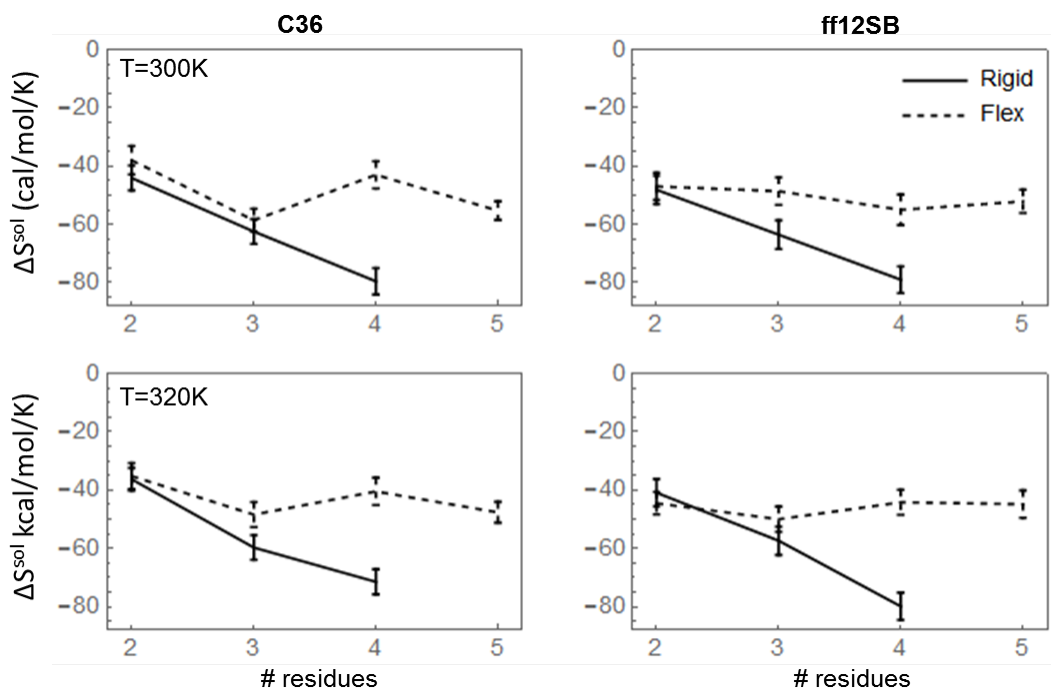

**Figure S2:** Solvation entropy calculated by the end point energy approach (see Methods) at 300K (top row) and 320K (bottom row) with the C36 (left) and ff12SB (right) force fields.

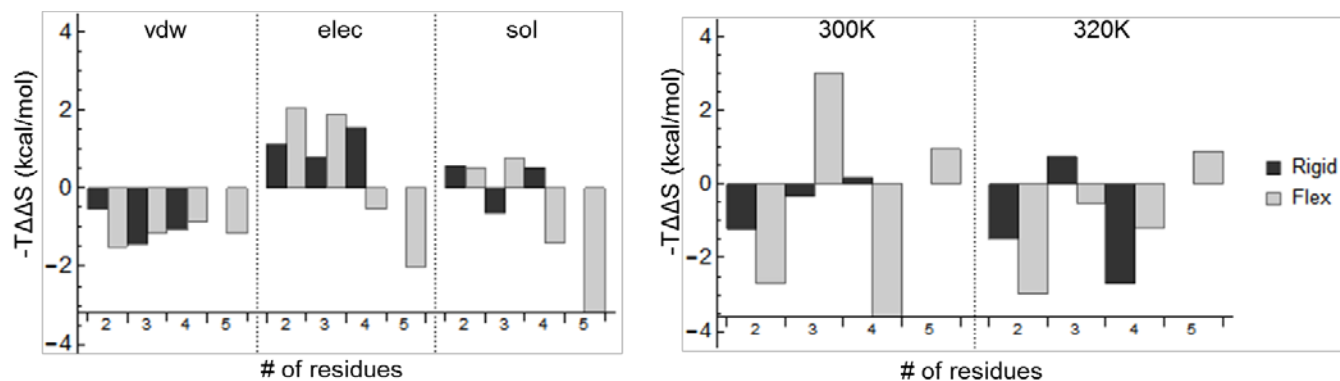

**Figure S3:** Differences in solvation entropy and its vdw and elec components between C36 and ff12SB calculated at 310K using the finite difference approach (left). Black and gray bars are the results for the rigid and flexible oligoglycine models, respectively. The right figure shows differences in the overall solvation entropy between force fields at 300K and 320K from the end point energy approach.

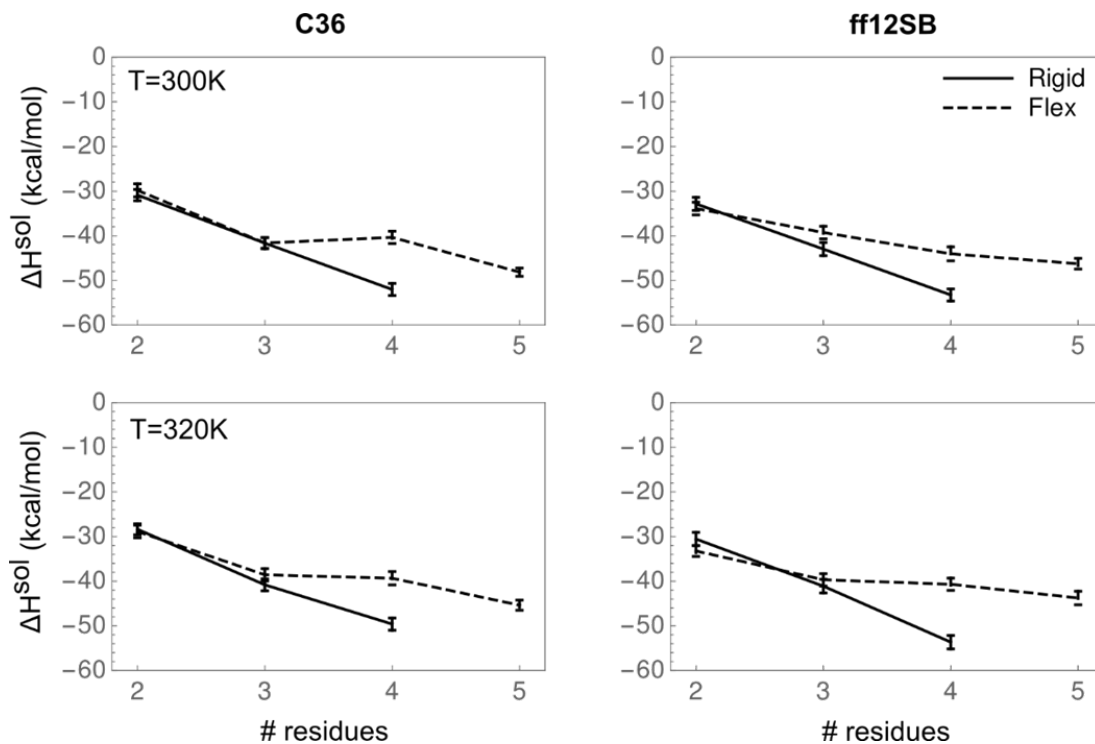

**Figure S4:** Solvation enthalpy calculated by the end point energy approach at 300K (top row) and 320K (bottom row) with the C36 (left) and ff12SB (right) force fields.

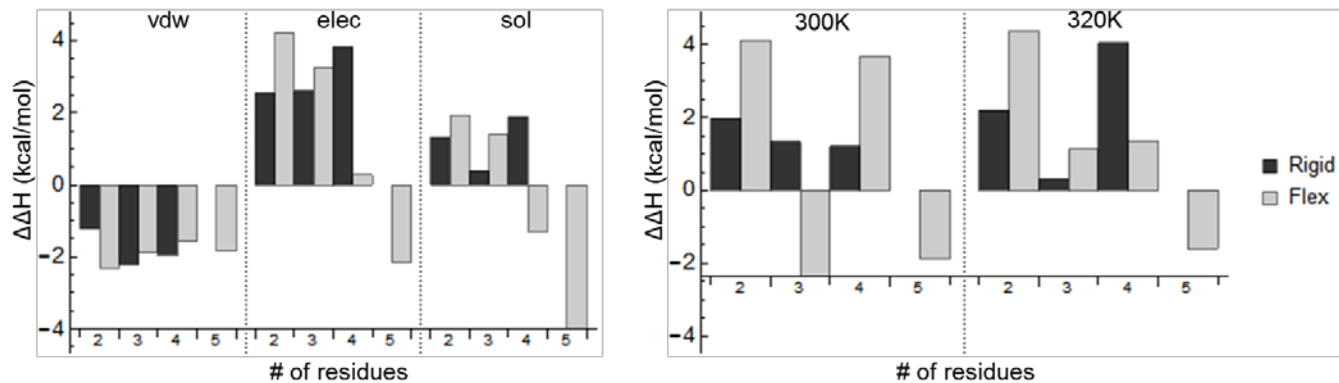

**Figure S5:** Differences in solvation enthalpy and its vdw and elec components between C36 and ff12SB calculated at 310K using the finite difference approach (left). Black and gray bars are the results for the rigid and flexible oligoglycine models, respectively. The right figure shows differences in the overall solvation enthalpy between force fields at 300K and 320K from the end point energy approach.

**Table S1:** Oligoglycine solvation free energies

| CHARMM36 |       |                         |                      |                      |                        |                      |                      |                        | Amber ff12SB |       |                         |                      |                      |                        |                      |                      |                        |          |       |                          |                       |                       |                         |                       |                       |                         |           |       |                          |                       |                       |                         |                       |                       |                         |
|----------|-------|-------------------------|----------------------|----------------------|------------------------|----------------------|----------------------|------------------------|--------------|-------|-------------------------|----------------------|----------------------|------------------------|----------------------|----------------------|------------------------|----------|-------|--------------------------|-----------------------|-----------------------|-------------------------|-----------------------|-----------------------|-------------------------|-----------|-------|--------------------------|-----------------------|-----------------------|-------------------------|-----------------------|-----------------------|-------------------------|
| Flexible |       |                         |                      |                      |                        |                      |                      |                        | Rigid/Ext    |       |                         |                      |                      |                        |                      |                      |                        | Flexible |       |                          |                       |                       |                         |                       |                       |                         | Rigid/Ext |       |                          |                       |                       |                         |                       |                       |                         |
| N        | Temp. | $\Delta G_{flex}^{vdw}$ | $\sigma_{ACF}^{vdw}$ | $\sigma_{BSE}^{vdw}$ | $\Delta G_{fix}^{vdw}$ | $\sigma_{ACF}^{vdw}$ | $\sigma_{BSE}^{vdw}$ | $\Delta\Delta G^{vdw}$ | N            | Temp. | $\Delta G_{flex}^{vdw}$ | $\sigma_{ACF}^{vdw}$ | $\sigma_{BSE}^{vdw}$ | $\Delta G_{fix}^{vdw}$ | $\sigma_{ACF}^{vdw}$ | $\sigma_{BSE}^{vdw}$ | $\Delta\Delta G^{vdw}$ | N        | Temp. | $\Delta G_{flex}^{elec}$ | $\sigma_{ACF}^{elec}$ | $\sigma_{BSE}^{elec}$ | $\Delta G_{fix}^{elec}$ | $\sigma_{ACF}^{elec}$ | $\sigma_{BSE}^{elec}$ | $\Delta\Delta G^{elec}$ | N         | Temp. | $\Delta G_{flex}^{elec}$ | $\sigma_{ACF}^{elec}$ | $\sigma_{BSE}^{elec}$ | $\Delta G_{fix}^{elec}$ | $\sigma_{ACF}^{elec}$ | $\sigma_{BSE}^{elec}$ | $\Delta\Delta G^{elec}$ |
| 2        | 300   | 0.149                   | 0.031                | 0.009                | -0.203                 | 0.023                | 0.010                | -0.352                 | 2            | 300   | 1.000                   | 0.029                | 0.012                | 0.498                  | 0.026                | 0.011                | -0.502                 | 2        | 300   | -18.580                  | 0.052                 | 0.012                 | -17.461                 | 0.021                 | 0.008                 | 1.119                   | 2         | 300   | -19.834                  | 0.101                 | 0.019                 | -18.420                 | 0.030                 | 0.014                 | 1.414                   |
|          | 320   | 0.771                   | 0.024                | 0.011                | 0.442                  | 0.023                | 0.011                | -0.329                 |              | 320   | 1.530                   | 0.029                | 0.010                | 1.110                  | 0.022                | 0.012                | -0.417                 |          | 320   | -17.618                  | 0.049                 | 0.016                 | -16.762                 | 0.033                 | 0.014                 | 0.856                   |           | 320   | -18.987                  | 0.090                 | 0.019                 | -17.481                 | 0.029                 | 0.014                 | 1.506                   |
| 3        | 300   | -0.034                  | 0.034                | 0.018                | -0.842                 | 0.031                | 0.013                | -0.808                 | 3            | 300   | 0.727                   | 0.035                | 0.011                | -0.003                 | 0.027                | 0.014                | -0.730                 | 3        | 300   | -24.048                  | 0.354                 | 0.052                 | -22.921                 | 0.039                 | 0.016                 | 1.127                   | 3         | 300   | -24.706                  | 0.282                 | 0.041                 | -23.930                 | 0.034                 | 0.017                 | 0.776                   |
|          | 320   | 0.641                   | 0.032                | 0.012                | -0.002                 | 0.034                | 0.011                | -0.643                 |              | 320   | 1.330                   | 0.031                | 0.011                | 0.744                  | 0.027                | 0.013                | -0.583                 |          | 320   | -23.078                  | 0.265                 | 0.048                 | -21.708                 | 0.042                 | 0.014                 | 1.370                   |           | 320   | -23.687                  | 0.269                 | 0.041                 | -22.758                 | 0.043                 | 0.016                 | 0.929                   |
| 4        | 300   | -0.558                  | 0.039                | 0.023                | -1.483                 | 0.032                | 0.014                | -0.925                 | 4            | 300   | 0.178                   | 0.043                | 0.021                | -0.538                 | 0.033                | 0.015                | -0.716                 | 4        | 300   | -27.485                  | 0.654                 | 0.131                 | -28.182                 | 0.049                 | 0.018                 | -0.697                  | 4         | 300   | -27.550                  | 0.475                 | 0.079                 | -29.567                 | 0.043                 | 0.019                 | -2.017                  |
|          | 320   | 0.169                   | 0.039                | 0.019                | -0.491                 | 0.037                | 0.012                | -0.660                 |              | 320   | 0.849                   | 0.039                | 0.016                | 0.386                  | 0.036                | 0.014                | -0.463                 |          | 320   | -26.400                  | 0.481                 | 0.098                 | -26.738                 | 0.043                 | 0.016                 | -0.338                  |           | 320   | -26.556                  | 0.353                 | 0.068                 | -28.089                 | 0.042                 | 0.018                 | -1.533                  |
| 5        | 300   | -0.998                  | 0.065                | 0.024                |                        |                      |                      |                        | 5            | 300   | -0.283                  | 0.058                | 0.021                |                        |                      |                      |                        | 5        | 300   | -30.564                  | 1.035                 | 0.238                 |                         |                       |                       |                         | 5         | 300   | -30.645                  | 1.017                 | 0.118                 |                         |                       |                       |                         |
|          | 320   | -0.234                  | 0.051                | 0.018                |                        |                      |                      |                        |              | 320   | 0.406                   | 0.054                | 0.026                |                        |                      |                      |                        |          | 320   | -31.562                  | 1.037                 | 0.239                 |                         |                       |                       |                         |           | 320   | -29.422                  | 0.635                 | 0.089                 |                         |                       |                       |                         |
|          |       |                         |                      |                      |                        |                      |                      |                        |              |       |                         |                      |                      |                        |                      |                      |                        |          |       |                          |                       |                       |                         |                       |                       |                         |           |       |                          |                       |                       |                         |                       |                       |                         |

Solvation free energies of Gly<sub>2-5</sub> either fixed in a rigid-extended conformation (subscript “fix”) or allowed to sample conformation space with no physical constraints (subscript “flex”) at 300K and 320K. Results for the van der Waals (vdw), electrostatic (elec), and overall (sol) solvation free energies are reported from top to bottom in units of kcal/mol for the C36 (left) and Amber ff12SB (right) force fields.  $\Delta\Delta G$ 's are provided as the difference between  $\Delta G_{fix}$  and  $\Delta G_{flex}$  for each component and the overall solvation free energy at both temperatures.  $N$  is the number of glycine residues,  $\sigma_{ACF}^{vdw}$  and  $\sigma_{ACF}^{elec}$  are the errors in  $\Delta G^{vdw}$  and  $\Delta G^{elec}$ , respectively, calculated from an autocorrelation time analysis (see Methods), and  $\sigma_{BSE}^{vdw}$  and  $\sigma_{BSE}^{elec}$  are the errors in  $\Delta G^{vdw}$  and  $\Delta G^{elec}$ , respectively, calculated from a block standard error

analysis. Error propagation was used to compute  $\sigma_{ACF}^{sol} = \sqrt{(\sigma_{ACF}^{vdw})^2 + (\sigma_{ACF}^{elec})^2}$  and  $\sigma_{BSE}^{sol} =$

$$\sqrt{(\sigma_{BSE}^{vdw})^2 + (\sigma_{BSE}^{elec})^2}$$

**Table S2:** Oligoglycine solvation entropies calculated by the finite difference approach

| CHARMM36 |                          |                       |                       |                         |                       |                       |                         | Amber ff12SB |                          |                       |                       |                         |                       |                       |                         |
|----------|--------------------------|-----------------------|-----------------------|-------------------------|-----------------------|-----------------------|-------------------------|--------------|--------------------------|-----------------------|-----------------------|-------------------------|-----------------------|-----------------------|-------------------------|
| Flexible |                          |                       |                       | Rigid/Ext               |                       |                       |                         | Flexible     |                          |                       |                       | Rigid/Ext               |                       |                       |                         |
| N        | $\Delta S_{flex}^{vdw}$  | $\sigma_{ACF}^{vdw}$  | $\sigma_{BSE}^{vdw}$  | $\Delta S_{fix}^{vdw}$  | $\sigma_{ACF}^{vdw}$  | $\sigma_{BSE}^{vdw}$  | $\Delta\Delta S^{vdw}$  | N            | $\Delta S_{flex}^{vdw}$  | $\sigma_{ACF}^{vdw}$  | $\sigma_{BSE}^{vdw}$  | $\Delta S_{fix}^{vdw}$  | $\sigma_{ACF}^{vdw}$  | $\sigma_{BSE}^{vdw}$  | $\Delta\Delta S^{vdw}$  |
| 2        | -31.10                   | 1.96                  | 0.71                  | -32.25                  | 1.63                  | 0.74                  | -1.15                   | 2            | -26.25                   | 2.05                  | 0.78                  | -30.50                  | 1.70                  | 0.81                  | -4.25                   |
| 3        | -33.75                   | 2.33                  | 1.08                  | -42.00                  | 2.30                  | 0.85                  | -8.25                   | 3            | -30.00                   | 2.34                  | 0.78                  | -37.37                  | 1.91                  | 0.96                  | -7.37                   |
| 4        | -36.35                   | 2.76                  | 1.49                  | -49.60                  | 2.45                  | 0.92                  | -13.25                  | 4            | -33.55                   | 2.90                  | 1.32                  | -46.20                  | 2.44                  | 1.03                  | -12.65                  |
| 5        | -38.20                   | 4.13                  | 1.50                  |                         |                       |                       |                         | 5            | -34.45                   | 3.96                  | 1.67                  |                         |                       |                       |                         |
|          | $\Delta S_{flex}^{elec}$ | $\sigma_{ACF}^{elec}$ | $\sigma_{BSE}^{elec}$ | $\Delta S_{fix}^{elec}$ | $\sigma_{ACF}^{elec}$ | $\sigma_{BSE}^{elec}$ | $\Delta\Delta S^{elec}$ |              | $\Delta S_{flex}^{elec}$ | $\sigma_{ACF}^{elec}$ | $\sigma_{BSE}^{elec}$ | $\Delta S_{fix}^{elec}$ | $\sigma_{ACF}^{elec}$ | $\sigma_{BSE}^{elec}$ | $\Delta\Delta S^{elec}$ |
| 2        | -9.55                    | 3.37                  | 0.81                  | -12.85                  | 1.56                  | 0.60                  | -3.30                   | 2            | -16.15                   | 6.48                  | 1.10                  | -16.50                  | 1.24                  | 0.57                  | -0.35                   |
| 3        | -14.80                   | 21.97                 | 3.36                  | -18.70                  | 1.70                  | 0.64                  | -3.90                   | 3            | -20.95                   | 19.31                 | 2.79                  | -21.25                  | 1.96                  | 0.67                  | -0.30                   |
| 4        | -17.90                   | 40.49                 | 8.04                  | -22.65                  | 2.14                  | 0.74                  | -4.75                   | 4            | -16.15                   | 29.45                 | 5.03                  | -27.65                  | 1.71                  | 0.81                  | -11.50                  |
| 5        | -33.20                   | 72.31                 | 13.68                 |                         |                       |                       |                         | 5            | -26.70                   | 59.83                 | 7.19                  |                         |                       |                       |                         |
|          | $\Delta S_{flex}^{sol}$  | $\sigma_{ACF}^{sol}$  | $\sigma_{BSE}^{sol}$  | $\Delta S_{fix}^{sol}$  | $\sigma_{ACF}^{sol}$  | $\sigma_{BSE}^{sol}$  | $\Delta\Delta S^{sol}$  |              | $\Delta S_{flex}^{sol}$  | $\sigma_{ACF}^{sol}$  | $\sigma_{BSE}^{sol}$  | $\Delta S_{fix}^{sol}$  | $\sigma_{ACF}^{sol}$  | $\sigma_{BSE}^{sol}$  | $\Delta\Delta S^{sol}$  |
| 2        | -40.65                   | 3.87                  | 1.08                  | -45.10                  | 2.26                  | 0.96                  | -4.45                   | 2            | -42.35                   | 6.76                  | 1.35                  | -46.95                  | 2.09                  | 0.99                  | -4.60                   |
| 3        | -48.50                   | 22.11                 | 3.53                  | -60.65                  | 2.87                  | 1.07                  | -12.15                  | 3            | -50.95                   | 19.49                 | 2.90                  | -58.60                  | 2.74                  | 1.17                  | -7.65                   |
| 4        | -54.25                   | 40.59                 | 8.18                  | -72.20                  | 3.26                  | 1.18                  | -17.95                  | 4            | -49.70                   | 29.59                 | 5.20                  | -73.90                  | 3.01                  | 1.31                  | -24.20                  |
| 5        | -71.40                   | 72.45                 | 13.76                 |                         |                       |                       |                         | 5            | -61.15                   | 59.95                 | 7.38                  |                         |                       |                       |                         |

Solvation entropies of rigid and flexible Gly<sub>2-5</sub> calculated by the finite difference approach (FD). Results for the vdw, elec, and overall solvation entropies are given from top to bottom for C36 (left) and ff12SB (right). Units are in cal/mol/K. Errors in  $\Delta S^{vdw}$ ,  $\Delta S^{elec}$ , and  $\Delta S^{sol}$  were calculated by propagating, separately, the ACF and BSE errors in  $\Delta G^{vdw}$ ,  $\Delta G^{elec}$ , and  $\Delta G^{sol}$ .  $\Delta\Delta S$ 's are provided as the difference between  $\Delta S_{fix}$  and  $\Delta S_{flex}$ .

**Table S3:** Oligoglycine solvation entropies calculated by the end point energy approach

| CHARMM36 |       |                         |                      |                      |                        |                      |                      | Amber ff12SB           |   |       |                         |                      |                      |                        |                      |                      |                        |
|----------|-------|-------------------------|----------------------|----------------------|------------------------|----------------------|----------------------|------------------------|---|-------|-------------------------|----------------------|----------------------|------------------------|----------------------|----------------------|------------------------|
| Flexible |       |                         |                      | Rigid/Ext            |                        |                      |                      | Flexible               |   |       |                         | Rigid/Ext            |                      |                        |                      |                      |                        |
| N        | Temp. | $\Delta S_{flex}^{sol}$ | $\sigma_{ACF}^{sol}$ | $\sigma_{BSE}^{sol}$ | $\Delta S_{fix}^{sol}$ | $\sigma_{ACF}^{sol}$ | $\sigma_{BSE}^{sol}$ | $\Delta\Delta S^{sol}$ | N | Temp. | $\Delta S_{flex}^{sol}$ | $\sigma_{ACF}^{sol}$ | $\sigma_{BSE}^{sol}$ | $\Delta S_{fix}^{sol}$ | $\sigma_{ACF}^{sol}$ | $\sigma_{BSE}^{sol}$ | $\Delta\Delta S^{sol}$ |
| 2        | 300   | -37.970                 | 8.349                | 4.880                | -44.063                | 7.461                | 4.244                | -6.093                 | 2 | 300   | -46.937                 | 8.397                | 4.727                | -48.120                | 7.067                | 4.874                | -1.183                 |
|          | 320   | -35.159                 | 7.748                | 4.435                | -36.266                | 8.073                | 3.875                | -1.106                 |   | 320   | -44.500                 | 7.608                | 3.854                | -40.869                | 7.579                | 4.710                | 3.631                  |
| 3        | 300   | -58.583                 | 8.301                | 3.944                | -62.440                | 8.224                | 4.227                | -3.857                 | 3 | 300   | -48.573                 | 8.489                | 4.742                | -63.540                | 8.481                | 4.914                | -14.967                |
|          | 320   | -48.397                 | 8.105                | 4.328                | -59.694                | 8.101                | 4.200                | -11.297                |   | 320   | -49.981                 | 7.870                | 4.330                | -57.369                | 8.651                | 4.828                | -7.388                 |
| 4        | 300   | -42.957                 | 7.243                | 4.670                | -79.540                | 7.778                | 4.554                | -36.583                | 4 | 300   | -54.993                 | 7.623                | 5.230                | -78.983                | 7.851                | 4.570                | -23.990                |
|          | 320   | -40.438                 | 7.606                | 4.697                | -71.469                | 8.042                | 4.275                | -31.031                |   | 320   | -44.156                 | 8.602                | 4.318                | -79.888                | 7.192                | 4.703                | -35.731                |
| 5        | 300   | -55.280                 | 8.056                | 3.214                |                        |                      |                      |                        | 5 | 300   | -52.093                 | 7.727                | 4.029                |                        |                      |                      |                        |
|          | 320   | -47.609                 | 7.293                | 3.575                |                        |                      |                      |                        |   | 320   | -44.809                 | 7.535                | 4.718                |                        |                      |                      |                        |

Solvation enthalpies of rigid and flexible Gly<sub>2-5</sub> calculated by the end point energy (EP) approach at 300K and 320K with the C36 (left) and ff12SB (right) force fields. Errors in  $\Delta G^{sol}$  were propagated with those in  $\Delta H^{sol}$  estimated by the EP approach at both temperatures to yield error estimates of  $\Delta S^{sol}$ .  $\Delta\Delta S$ 's are provided as the difference between  $\Delta S_{fix}$  and  $\Delta S_{flex}$ .

**Table S4:** Oligoglycine solvation enthalpies calculated by the finite difference approach

| CHARMM36          |                          |                       |                       |                         |                       |                       |                         | Amber ff12SB      |                          |                       |                       |                         |                       |                       |                         |
|-------------------|--------------------------|-----------------------|-----------------------|-------------------------|-----------------------|-----------------------|-------------------------|-------------------|--------------------------|-----------------------|-----------------------|-------------------------|-----------------------|-----------------------|-------------------------|
| Flexible          |                          |                       |                       | Rigid/Ext               |                       |                       |                         | Flexible          |                          |                       |                       | Rigid/Ext               |                       |                       |                         |
| N                 | $\Delta H_{flex}^{vdw}$  | $\sigma_{ACF}^{vdw}$  | $\sigma_{BSE}^{vdw}$  | $\Delta H_{fix}^{vdw}$  | $\sigma_{ACF}^{vdw}$  | $\sigma_{BSE}^{vdw}$  | $\Delta\Delta H^{vdw}$  | N                 | $\Delta H_{flex}^{vdw}$  | $\sigma_{ACF}^{vdw}$  | $\sigma_{BSE}^{vdw}$  | $\Delta H_{fix}^{vdw}$  | $\sigma_{ACF}^{vdw}$  | $\sigma_{BSE}^{vdw}$  | $\Delta\Delta H^{vdw}$  |
| 2                 | -9.18                    | 0.61                  | 0.22                  | -9.88                   | 0.50                  | 0.23                  | -0.70                   | 2                 | -6.87                    | 0.64                  | 0.24                  | -8.65                   | 0.53                  | 0.25                  | -1.78                   |
| 3                 | -10.16                   | 0.72                  | 0.34                  | -13.44                  | 0.71                  | 0.26                  | -3.28                   | 3                 | -8.27                    | 0.73                  | 0.24                  | -11.21                  | 0.59                  | 0.30                  | -2.94                   |
| 4                 | -11.46                   | 0.86                  | 0.46                  | -16.36                  | 0.76                  | 0.29                  | -4.90                   | 4                 | -9.89                    | 0.90                  | 0.41                  | -14.40                  | 0.76                  | 0.32                  | -4.51                   |
| 5                 | -12.46                   | 1.28                  | 0.47                  |                         |                       |                       |                         | 5                 | -10.62                   | 1.23                  | 0.52                  |                         |                       |                       |                         |
| $\Delta H^{elec}$ |                          |                       |                       |                         |                       |                       |                         | $\Delta H^{elec}$ |                          |                       |                       |                         |                       |                       |                         |
| N                 | $\Delta H_{flex}^{elec}$ | $\sigma_{ACF}^{elec}$ | $\sigma_{BSE}^{elec}$ | $\Delta H_{fix}^{elec}$ | $\sigma_{ACF}^{elec}$ | $\sigma_{BSE}^{elec}$ | $\Delta\Delta H^{elec}$ | N                 | $\Delta H_{flex}^{elec}$ | $\sigma_{ACF}^{elec}$ | $\sigma_{BSE}^{elec}$ | $\Delta H_{fix}^{elec}$ | $\sigma_{ACF}^{elec}$ | $\sigma_{BSE}^{elec}$ | $\Delta\Delta H^{elec}$ |
| 2                 | -21.44                   | 1.05                  | 0.25                  | -21.32                  | 0.48                  | 0.19                  | 0.13                    | 2                 | -25.68                   | 2.01                  | 0.34                  | -23.87                  | 0.39                  | 0.18                  | 1.81                    |
| 3                 | -28.45                   | 6.82                  | 1.04                  | -27.69                  | 0.53                  | 0.20                  | 0.76                    | 3                 | -31.72                   | 5.99                  | 0.87                  | -30.30                  | 0.61                  | 0.21                  | 1.42                    |
| 4                 | -32.30                   | 12.56                 | 2.49                  | -33.49                  | 0.66                  | 0.23                  | -1.20                   | 4                 | -32.57                   | 9.14                  | 1.56                  | -37.32                  | 0.53                  | 0.25                  | -4.75                   |
| 5                 | -40.52                   | 22.43                 | 4.24                  |                         |                       |                       |                         | 5                 | -38.37                   | 18.56                 | 2.23                  |                         |                       |                       |                         |
| $\Delta H^{sol}$  |                          |                       |                       |                         |                       |                       |                         | $\Delta H^{sol}$  |                          |                       |                       |                         |                       |                       |                         |
| N                 | $\Delta H_{flex}^{sol}$  | $\sigma_{ACF}^{sol}$  | $\sigma_{BSE}^{sol}$  | $\Delta H_{fix}^{sol}$  | $\sigma_{ACF}^{sol}$  | $\sigma_{BSE}^{sol}$  | $\Delta\Delta H^{sol}$  | N                 | $\Delta H_{flex}^{sol}$  | $\sigma_{ACF}^{sol}$  | $\sigma_{BSE}^{sol}$  | $\Delta H_{fix}^{sol}$  | $\sigma_{ACF}^{sol}$  | $\sigma_{BSE}^{sol}$  | $\Delta\Delta H^{sol}$  |
| 2                 | -30.63                   | 1.20                  | 0.34                  | -31.19                  | 0.70                  | 0.30                  | -0.57                   | 2                 | -32.54                   | 2.10                  | 0.42                  | -32.51                  | 0.65                  | 0.31                  | 0.03                    |
| 3                 | -38.60                   | 6.86                  | 1.10                  | -41.12                  | 0.89                  | 0.33                  | -2.52                   | 3                 | -39.99                   | 6.04                  | 0.90                  | -41.51                  | 0.85                  | 0.36                  | -1.52                   |
| 4                 | -43.76                   | 12.59                 | 2.54                  | -49.84                  | 1.01                  | 0.37                  | -6.08                   | 4                 | -42.46                   | 9.18                  | 1.61                  | -51.74                  | 0.93                  | 0.41                  | -9.28                   |
| 5                 | -52.98                   | 22.47                 | 4.27                  |                         |                       |                       |                         | 5                 | -48.99                   | 18.60                 | 2.29                  |                         |                       |                       |                         |

Solvation enthalpies of rigid and flexible Gly<sub>2-5</sub> calculated by the FD approach at 310K. Results for the vdw, elec, and overall solvation enthalpy are given from top to bottom for C36 (left) and ff12SB (right). Units are in kcal/mol. Errors in  $\Delta H^{vdw}$ ,  $\Delta H^{elec}$ , and  $\Delta H^{sol}$  were calculated by propagating, separately, the ACF and BSE errors in  $\Delta G^{vdw}$ ,  $\Delta G^{elec}$ , and  $\Delta G^{sol}$ .  $\Delta\Delta H$ 's are provided as the difference between  $\Delta H_{fix}$  and  $\Delta H_{flex}$ .



**Table S5:** Oligoglycine solvation enthalpies calculated by the end point energy approach

| CHARMM36 |       |                         |                      |                      |                        |                      |                      |                        | Amber ff12SB |       |                         |                      |                      |                        |                      |                      |                        |
|----------|-------|-------------------------|----------------------|----------------------|------------------------|----------------------|----------------------|------------------------|--------------|-------|-------------------------|----------------------|----------------------|------------------------|----------------------|----------------------|------------------------|
|          |       | Flexible                |                      |                      | Rigid/Ext              |                      |                      | $\Delta\Delta H^{sol}$ |              |       | Flexible                |                      |                      | Rigid/Ext              |                      |                      | $\Delta\Delta H^{sol}$ |
| N        | Temp. | $\Delta H_{flex}^{sol}$ | $\sigma_{ACF}^{sol}$ | $\sigma_{BSE}^{sol}$ | $\Delta H_{fix}^{sol}$ | $\sigma_{ACF}^{sol}$ | $\sigma_{BSE}^{sol}$ |                        | N            | Temp. | $\Delta H_{flex}^{sol}$ | $\sigma_{ACF}^{sol}$ | $\sigma_{BSE}^{sol}$ | $\Delta H_{fix}^{sol}$ | $\sigma_{ACF}^{sol}$ | $\sigma_{BSE}^{sol}$ |                        |
| 2        | 300   | -29.822                 | 2.504                | 1.464                | -30.883                | 2.238                | 1.273                | -1.061                 | 2            | 300   | -33.915                 | 2.517                | 1.418                | -32.856                | 2.120                | 1.462                | 1.059                  |
|          | 320   | -28.869                 | 2.479                | 1.419                | -28.367                | 2.583                | 1.240                | 0.502                  |              | 320   | -33.227                 | 2.433                | 1.233                | -30.559                | 2.425                | 1.507                | 2.668                  |
| 3        | 300   | -41.623                 | 2.465                | 1.182                | -41.653                | 2.467                | 1.268                | -0.030                 | 3            | 300   | -39.278                 | 2.531                | 1.422                | -42.992                | 2.544                | 1.474                | -3.714                 |
|          | 320   | -38.565                 | 2.580                | 1.384                | -40.810                | 2.592                | 1.344                | -2.245                 |              | 320   | -39.681                 | 2.504                | 1.385                | -41.116                | 2.768                | 1.545                | -1.435                 |
| 4        | 300   | -40.372                 | 2.072                | 1.395                | -52.044                | 2.333                | 1.366                | -11.672                | 4            | 300   | -44.048                 | 2.237                | 1.567                | -53.262                | 2.355                | 1.371                | -9.214                 |
|          | 320   | -39.340                 | 2.386                | 1.500                | -49.608                | 2.573                | 1.368                | -10.268                |              | 320   | -40.686                 | 2.730                | 1.380                | -53.653                | 2.301                | 1.505                | -12.967                |
| 5        | 300   | -48.146                 | 2.183                | 0.934                |                        |                      |                      |                        | 5            | 300   | -46.273                 | 2.083                | 1.203                |                        |                      |                      |                        |
|          | 320   | -45.369                 | 2.103                | 1.136                |                        |                      |                      |                        |              | 320   | -43.761                 | 2.326                | 1.507                |                        |                      |                      |                        |

Solvation enthalpies of rigid and flexible Gly<sub>2-5</sub> calculated by the end point energy approach at 300K and 320K with C36 (left) and ff12SB (right). Errors in  $\Delta H^{sol}$  ( $\sigma_{BSE}^{sol}$ ,  $\sigma_{BSE}^{sol}$ ) were directly calculated and the details can be found in the Methods section and Appendix A. Units are in kcal/mol and  $\Delta\Delta H'$ s are provided as the difference between  $\Delta H_{fix}$  and  $\Delta H_{flex}$ .

**Table S6:** Solvation thermodynamics calculated by the finite difference approach at 310K

| CHARMM36 |                          |                          |                            |                         |                         |                           |                         |                         |                           |  |
|----------|--------------------------|--------------------------|----------------------------|-------------------------|-------------------------|---------------------------|-------------------------|-------------------------|---------------------------|--|
|          | Flexible                 |                          |                            | Rigid/Ext               |                         |                           |                         |                         |                           |  |
| N        | $\Delta G_{flex}^{vdw}$  | $\Delta H_{flex}^{vdw}$  | $-T\Delta S_{flex}^{vdw}$  | $\Delta G_{fix}^{vdw}$  | $\Delta H_{fix}^{vdw}$  | $-T\Delta S_{fix}^{vdw}$  | $\Delta\Delta G^{vdw}$  | $\Delta\Delta H^{vdw}$  | $-T\Delta\Delta S^{vdw}$  |  |
| 2        | 0.46                     | -9.18                    | 9.64                       | 0.12                    | -9.88                   | 10.00                     | -0.34                   | -0.70                   | 0.35                      |  |
| 3        | 0.30                     | -10.16                   | 10.46                      | -0.42                   | -13.44                  | 13.02                     | -0.73                   | -3.28                   | 2.56                      |  |
| 4        | -0.19                    | -11.46                   | 11.27                      | -0.99                   | -16.36                  | 15.38                     | -0.79                   | -4.90                   | 4.11                      |  |
| 5        | -0.62                    | -12.46                   | 11.84                      |                         |                         |                           |                         |                         |                           |  |
| N        | $\Delta G_{flex}^{elec}$ | $\Delta H_{flex}^{elec}$ | $-T\Delta S_{flex}^{elec}$ | $\Delta G_{fix}^{elec}$ | $\Delta H_{fix}^{elec}$ | $-T\Delta S_{fix}^{elec}$ | $\Delta\Delta G^{elec}$ | $\Delta\Delta H^{elec}$ | $-T\Delta\Delta S^{elec}$ |  |
| 2        | -18.48                   | -21.44                   | 2.96                       | -17.33                  | -21.32                  | 3.98                      | 1.15                    | 0.13                    | 1.02                      |  |
| 3        | -23.87                   | -28.45                   | 4.59                       | -21.89                  | -27.69                  | 5.80                      | 1.97                    | 0.76                    | 1.21                      |  |
| 4        | -26.75                   | -32.30                   | 5.55                       | -26.47                  | -33.49                  | 7.02                      | 0.27                    | -1.20                   | 1.47                      |  |
| 5        | -30.23                   | -40.52                   | 10.29                      |                         |                         |                           |                         |                         |                           |  |
| N        | $\Delta G_{flex}^{sol}$  | $\Delta H_{flex}^{sol}$  | $-T\Delta S_{flex}^{sol}$  | $\Delta G_{fix}^{sol}$  | $\Delta H_{fix}^{sol}$  | $-T\Delta S_{fix}^{sol}$  | $\Delta\Delta G^{sol}$  | $\Delta\Delta H^{sol}$  | $-T\Delta\Delta S^{sol}$  |  |
| 2        | -18.02                   | -30.63                   | 12.60                      | -17.21                  | -31.19                  | 13.98                     | 0.81                    | -0.57                   | 1.38                      |  |
| 3        | -23.56                   | -38.60                   | 15.03                      | -22.31                  | -41.12                  | 18.80                     | 1.25                    | -2.52                   | 3.77                      |  |
| 4        | -26.94                   | -43.76                   | 16.82                      | -27.46                  | -49.84                  | 22.38                     | -0.52                   | -6.08                   | 5.56                      |  |
| 5        | -30.85                   | -52.98                   | 22.13                      |                         |                         |                           |                         |                         |                           |  |

  

| Amber ff12SB |                          |                          |                            |                         |                         |                           |                         |                         |                           |  |
|--------------|--------------------------|--------------------------|----------------------------|-------------------------|-------------------------|---------------------------|-------------------------|-------------------------|---------------------------|--|
|              | Flexible                 |                          |                            | Rigid/Ext               |                         |                           |                         |                         |                           |  |
| N            | $\Delta G_{flex}^{vdw}$  | $\Delta H_{flex}^{vdw}$  | $-T\Delta S_{flex}^{vdw}$  | $\Delta G_{fix}^{vdw}$  | $\Delta H_{fix}^{vdw}$  | $-T\Delta S_{fix}^{vdw}$  | $\Delta\Delta G^{vdw}$  | $\Delta\Delta H^{vdw}$  | $-T\Delta\Delta S^{vdw}$  |  |
| 2            | 1.26                     | -6.87                    | 8.14                       | 0.80                    | -8.65                   | 9.46                      | -0.46                   | -1.78                   | 1.32                      |  |
| 3            | 1.03                     | -8.27                    | 9.30                       | 0.37                    | -11.21                  | 11.58                     | -0.66                   | -2.94                   | 2.28                      |  |
| 4            | 0.51                     | -9.89                    | 10.40                      | -0.08                   | -14.40                  | 14.32                     | -0.59                   | -4.51                   | 3.92                      |  |
| 5            | 0.06                     | -10.62                   | 10.68                      |                         |                         |                           |                         |                         |                           |  |
| N            | $\Delta G_{flex}^{elec}$ | $\Delta H_{flex}^{elec}$ | $-T\Delta S_{flex}^{elec}$ | $\Delta G_{fix}^{elec}$ | $\Delta H_{fix}^{elec}$ | $-T\Delta S_{fix}^{elec}$ | $\Delta\Delta G^{elec}$ | $\Delta\Delta H^{elec}$ | $-T\Delta\Delta S^{elec}$ |  |
| 2            | -20.67                   | -25.68                   | 5.01                       | -18.75                  | -23.87                  | 5.11                      | 1.92                    | 1.81                    | 0.11                      |  |
| 3            | -25.22                   | -31.72                   | 6.49                       | -23.71                  | -30.30                  | 6.59                      | 1.51                    | 1.42                    | 0.09                      |  |
| 4            | -27.57                   | -32.57                   | 5.01                       | -28.75                  | -37.32                  | 8.57                      | -1.18                   | -4.75                   | 3.57                      |  |
| 5            | -30.10                   | -38.37                   | 8.28                       |                         |                         |                           |                         |                         |                           |  |
| N            | $\Delta G_{flex}^{sol}$  | $\Delta H_{flex}^{sol}$  | $-T\Delta S_{flex}^{sol}$  | $\Delta G_{fix}^{sol}$  | $\Delta H_{fix}^{sol}$  | $-T\Delta S_{fix}^{sol}$  | $\Delta\Delta G^{sol}$  | $\Delta\Delta H^{sol}$  | $-T\Delta\Delta S^{sol}$  |  |
| 2            | -19.41                   | -32.54                   | 13.13                      | -17.95                  | -32.51                  | 14.55                     | 1.46                    | 0.03                    | 1.43                      |  |
| 3            | -24.20                   | -39.99                   | 15.79                      | -23.34                  | -41.51                  | 18.17                     | 0.85                    | -1.52                   | 2.37                      |  |
| 4            | -27.05                   | -42.46                   | 15.41                      | -28.83                  | -51.74                  | 22.91                     | -1.77                   | -9.28                   | 7.50                      |  |
| 5            | -30.03                   | -48.99                   | 18.96                      |                         |                         |                           |                         |                         |                           |  |

Solvation thermodynamics of rigid and flexible Gly<sub>2-5</sub> calculated by the FD approach at 310K. Results for each component and the overall solvation free energy are shown from top to bottom within each panel for C36 (top panel) and ff12SB (bottom panel).  $\Delta G^{sol}$  at 310K was approximated as the average of  $\Delta G^{sol}$

at 300K and 320K. Differences in each thermodynamic quantity between the rigid and flexible oligoglycine models are shown on the right side of each panel. All units are in kcal/mol.

**Table S7:** Solvation thermodynamics calculated by the end point energy approach at 300K and 320K

| CHARMM36 |                         |                         |                          |                         |                         |                          |                               |                               |                                | Amber ff12SB |                         |                         |                          |                         |                         |                          |                               |                               |                                |
|----------|-------------------------|-------------------------|--------------------------|-------------------------|-------------------------|--------------------------|-------------------------------|-------------------------------|--------------------------------|--------------|-------------------------|-------------------------|--------------------------|-------------------------|-------------------------|--------------------------|-------------------------------|-------------------------------|--------------------------------|
| N        | Flexible                |                         |                          | Rigid/Ext               |                         |                          | $\Delta\Delta G^{\text{sol}}$ | $\Delta\Delta H^{\text{sol}}$ | $-\Delta\Delta S^{\text{sol}}$ | N            | Flexible                |                         |                          | Rigid/Ext               |                         |                          | $\Delta\Delta G^{\text{sol}}$ | $\Delta\Delta H^{\text{sol}}$ | $-\Delta\Delta S^{\text{sol}}$ |
|          | $\Delta G^{\text{sol}}$ | $\Delta H^{\text{sol}}$ | $-\Delta S^{\text{sol}}$ | $\Delta G^{\text{sol}}$ | $\Delta H^{\text{sol}}$ | $-\Delta S^{\text{sol}}$ |                               |                               |                                |              | $\Delta G^{\text{sol}}$ | $\Delta H^{\text{sol}}$ | $-\Delta S^{\text{sol}}$ | $\Delta G^{\text{sol}}$ | $\Delta H^{\text{sol}}$ | $-\Delta S^{\text{sol}}$ |                               |                               |                                |
| 2        | -18.43                  | -29.82                  | 11.39                    | -17.66                  | -30.88                  | 13.22                    | 0.77                          | -1.06                         | 1.83                           | 2            | -19.83                  | -33.92                  | 14.08                    | -18.42                  | -32.86                  | 14.44                    | 1.41                          | 1.06                          | 0.36                           |
| 3        | -24.05                  | -41.62                  | 17.58                    | -22.92                  | -41.65                  | 18.73                    | 1.13                          | -0.03                         | 1.16                           | 3            | -24.71                  | -39.28                  | 14.57                    | -23.93                  | -42.99                  | 19.06                    | 0.78                          | -3.71                         | 4.49                           |
| 4        | -27.49                  | -40.37                  | 12.89                    | -28.18                  | -52.04                  | 23.86                    | -0.70                         | -11.67                        | 10.98                          | 4            | -27.55                  | -44.05                  | 16.50                    | -29.57                  | -53.26                  | 23.70                    | -2.02                         | -9.21                         | 7.20                           |
| 5        | -31.56                  | -48.15                  | 16.58                    |                         |                         |                          |                               |                               |                                | 5            | -30.65                  | -46.27                  | 15.63                    |                         |                         |                          |                               |                               |                                |

  

| CHARMM36 |                         |                         |                          |                         |                         |                          |                               |                               |                                | Amber ff12SB |                         |                         |                          |                         |                         |                          |                               |                               |                                |
|----------|-------------------------|-------------------------|--------------------------|-------------------------|-------------------------|--------------------------|-------------------------------|-------------------------------|--------------------------------|--------------|-------------------------|-------------------------|--------------------------|-------------------------|-------------------------|--------------------------|-------------------------------|-------------------------------|--------------------------------|
| N        | Flexible                |                         |                          | Rigid/Ext               |                         |                          | $\Delta\Delta G^{\text{sol}}$ | $\Delta\Delta H^{\text{sol}}$ | $-\Delta\Delta S^{\text{sol}}$ | N            | Flexible                |                         |                          | Rigid/Ext               |                         |                          | $\Delta\Delta G^{\text{sol}}$ | $\Delta\Delta H^{\text{sol}}$ | $-\Delta\Delta S^{\text{sol}}$ |
|          | $\Delta G^{\text{sol}}$ | $\Delta H^{\text{sol}}$ | $-\Delta S^{\text{sol}}$ | $\Delta G^{\text{sol}}$ | $\Delta H^{\text{sol}}$ | $-\Delta S^{\text{sol}}$ |                               |                               |                                |              | $\Delta G^{\text{sol}}$ | $\Delta H^{\text{sol}}$ | $-\Delta S^{\text{sol}}$ | $\Delta G^{\text{sol}}$ | $\Delta H^{\text{sol}}$ | $-\Delta S^{\text{sol}}$ |                               |                               |                                |
| 2        | -17.62                  | -28.87                  | 11.25                    | -16.76                  | -28.37                  | 11.61                    | 0.86                          | 0.50                          | 0.35                           | 2            | -18.99                  | -33.23                  | 14.24                    | -17.48                  | -30.56                  | 13.08                    | 1.51                          | 2.67                          | -1.16                          |
| 3        | -23.08                  | -38.57                  | 15.49                    | -21.71                  | -40.81                  | 19.10                    | 1.37                          | -2.25                         | 3.62                           | 3            | -23.69                  | -39.68                  | 15.99                    | -22.76                  | -41.12                  | 18.36                    | 0.93                          | -1.44                         | 2.36                           |
| 4        | -26.40                  | -39.34                  | 12.94                    | -26.74                  | -49.61                  | 22.87                    | -0.34                         | -10.27                        | 9.93                           | 4            | -26.56                  | -40.69                  | 14.13                    | -28.09                  | -53.65                  | 25.56                    | -1.53                         | -12.97                        | 11.43                          |
| 5        | -30.13                  | -45.37                  | 15.24                    |                         |                         |                          |                               |                               |                                | 5            | -29.42                  | -43.76                  | 14.34                    |                         |                         |                          |                               |                               |                                |

Solvation thermodynamics of rigid and flexible Gly<sub>2-5</sub> calculated by the EP approach at 300K (top row) and 320K (bottom row) with the C36 (left) and ff12SB (right) force fields. Differences in each thermodynamic quantity between the rigid and flexible oligoglycine models are shown on the right side of each panel. All units are in kcal/mol.
